# Supplementary material for: Cholinergic α7 nAChR signaling suppresses SARS-CoV-2 infection and inflammation in lung epithelial cells
Source: PubMed Central journal article supplement (PMC10901198; doi:10.1093/jmcb/mjad048), 2023-07-25
Supplement: mjad048_supplemental_file.pdf [file mjad048_supplemental_file.pdf]

1 **Cholinergic- $\alpha$ 7 nAChR signaling suppresses SARS-CoV-2 infection and**  
2 **inflammation in lung epithelial cells**

3  
4 Jing Wen, Jing Sun, Yanhong Tang, Jincun Zhao, Xiao Su

5  
6 **Supplementary information**

7  
8 **Materials and Methods**

9  
10 **Antibodies and compounds**

11 Anti-ACE2 (ab272500, Abcam), anti-FOS (66590-1-Ig, Proteintech), anti-SARS-CoV-2  
12 nucleocapsid (ab271180, Abcam), anti-GAPDH (M20006; Abmart), Rhodamine (TRITC)  
13 AffiniPure Goat Anti-Rabbit IgG (Jackson ImmunoResearch). GTS-21 (ab120560,  
14 Abcam), T5224 (T5416, Topscience).

15  
16 **Cells**

17 HEK293T cell line were cultured in Dulbecco's Modified Eagle Medium (DMEM) (Gibco)  
18 supplemented with 10% fetal bovine serum (Gibco), 100 U/ml penicillin, and 100  
19  $\mu$ g/ml of streptomycin (Invitrogen) at 37°C under 5% CO<sub>2</sub>. Calu3 cell line were cultured  
20 in Minimum Essential Medium (MEM) (Gibco) supplemented with 20% fetal bovine  
21 serum (Gibco), 100 U/ml penicillin, and 100  $\mu$ g/ml of streptomycin (Invitrogen) at 37°C  
22 under 5% CO<sub>2</sub>. Caco2 cell line were cultured in Eagle's minimum essential medium  
23 (MEM) (WISENT) supplemented with 20% fetal bovine serum (Gibco), 100 U/ml  
24 penicillin, and 100  $\mu$ g/ml of streptomycin (Invitrogen) at 37°C under 5% CO<sub>2</sub>.

25  
26 **Animals**

27  $\alpha$ 7nAChR-deficient mice (C57BL/6 background, B6.129S7-*Chrna7*<sup>tm1Bay</sup>, number  
28 003232) were purchased from the Jackson Laboratory (Bar Harbor, ME, USA. The mice  
29 were housed at 22°C on a 12 h light/dark cycle and with free access to sufficient food

30 and water. Anesthesia was conducted with pentobarbital sodium (50 mg/kg) injected  
31 intraperitoneally (ip). The animal studies were approved by the Committees on Animal  
32 Research of the Institut Pasteur of Shanghai, Chinese Academy of Sciences. The mice  
33 were instilled with SARS-CoV-2 (African strain) into the nasal cavity at a dose of  $5 \times 10^4$   
34 FFU. All SARS-CoV-2 infection experiments were performed in a biosafety level-3  
35 laboratory (Guangzhou Institute of Respiratory Health, Guangzhou, Guangdong China).

36

### 37 **SARS-CoV-2 pseudovirus production and virus entry assay**

38 HEK293T cells were co-transfection with pSPAX2, pLenti-GFP-luc and pCDNA3.1-SARS-  
39 CoV-2-S by Lipo2000. The supernatants were harvested at 48 h post transfection,  
40 filtered with 0.45  $\mu\text{m}$  filter, and centrifuged at  $1000 \times g$  for 5 min to remove cell debris.  
41 To infect cells with pseudovirions, cells were seeded into 24-well plates and inoculated  
42 with 500  $\mu\text{l}$  media containing pseudovirions. After 24 or 48 h, cells were lysed with 100  
43  $\mu\text{l}$  lysis buffer (promega) for 30 min on ice. The entry efficiency was measured by  
44 quantification of the luciferase activity (promega).

45

### 46 **Focus forming assay (FFA)**

47 Vero E6 cells were seeded in 96-well plates one day before infection. Virus cultures  
48 were serially diluted and used to inoculate Vero E6 cells at  $37^\circ\text{C}$  for 1 h. Inocula were  
49 then removed before adding 125  $\mu\text{l}$  1.6% carboxymethylcellulose warmed to  $37^\circ\text{C}$  per  
50 well. After 24 h, cells were fixed with 4% paraformaldehyde and permeabilized with  
51 0.2% Triton X-100. Cells were then incubated with a rabbit anti-SARS-CoV-2  
52 nucleocapsid protein polyclonal antibody (Cat. No.: 40143-T62, Sino Biological, Inc.  
53 Beijing), followed by an HRP-labeled goat anti-rabbit secondary antibody (Cat. No.:  
54 109-035-088, Jackson ImmunoResearch Laboratories, Inc. West Grove, PA). The foci  
55 were visualized by TrueBlue Peroxidase Substrate (KPL, Gaithersburg, MD), and  
56 counted with an ELISPOT reader (Cellular Technology Ltd. Cleveland, OH). Viral titers  
57 were calculated as FFU per ml or per gram tissue.

58

### 59 **Real-time (RT-) qPCR**

60 Total cellular RNA was extracted by TRIzol reagent (Invitrogen), and reverse transcribed  
61 into cDNA using a reverse transcriptase kit (Tiangen, Beijing, China). Real-time PCR was  
62 performed using the Thunderbird SYBR qPCR Mix (11203ES08; Yeasen) on the ABI  
63 QuantStudio 6 flex Real-Time PCR system. The primers were used as follows,  
64 **GAPDH**: forward, 5'-ATCCCATCACCATCTTCCAGG-3' and reverse, 5'-CCTTCTCCATGGTGG  
65 TGAAGA C-3';  
66 **Human ACE2**: forward, 5'-CAAGAGCAAACGGTTGAACAC-3' and reverse, 5'-  
67 CCAGAGCCTCTCATTGTAGTCT-3';  
68 **Human FOS**: forward, 5'- GGGGCAAGGTGGAACAGTTAT-3' and reverse, 5'-  
69 CCGCTTGGAGTGTATCAGTCA-3';  
70 **Mouse Fos**: forward 5'-CGGGTTTCAACGCCGACTA-3' and reverse, 5'-  
71 TTGGCACTAGAGACGGACAGA3';  
72 **Mouse CXcl2**: forward 5'-GCTGTCAATGCCTGAAG-3' and reverse, 5'-  
73 GCGTCACACTCAAGCTCT-3';  
74 **COVID19-N nucleocapsid**: forward 5'-CGAACTTCTCCTGCTAGAATGG-3' and reverse,  
75 5'-GTGACAGTTTGGCCTTGTTG-3'.

76

#### 77 **RNA-Seq and RNA-Seq data analysis**

78 The Calu3 cells (epithelial cells isolated from lung tissue) were pretreated with either  
79 PBS or GTS-21 (40  $\mu$ M) for 30 min, then infected with or without SARS-CoV-2 virus  
80 (African strain). The cells were harvested at 24 h after infection. Therefore, we had 4  
81 groups: PBS+PBS, GTS-21+PBS, PBS+SARS-CoV-2, and GTS-21+SARS-CoV-2. Each group  
82 had 3 samples.

83

84 The total RNA was extracted using TRIzol reagent (Invitrogen). After quality test, the  
85 total RNA of each sample was sequenced using the DNBSEQ platform (BGI BIG  
86 DATABASE (<https://biosys.bgi.com/#/report/mrna/expression>). Data were analyzed in  
87 online analysis software Dr. Tom and STRING online (<https://string-db.org>). GeneCards  
88 (the Human Gene Database) (<https://www.genecards.org>) was used to search genes  
89 with known functions.

90

#### 91 **Lung histology**

92 Hematoxylin and eosin (H&E) staining of lungs was conducted as described previously  
93 in our laboratory.

94

#### 95 **Confocal microscopy**

96 Cells were fixed in 4% formaldehyde and permeabilized with 0.1% Triton-X 100. Then,  
97 the cells were blocked with PBS containing 5% BSA for 30 min at room temperature.  
98 Further, the cells were stained with ACE2 antibody, followed by secondary Rhodamine  
99 (TRITC)-labeled anti-rabbit IgG antibodies (Jackson Immunoresearch) at room  
100 temperature. The nucleus was labeled with DAPI. Slides were imaged on a laser-  
101 scanning confocal microscope (Olympus FV-1200). Images were quantified by Image J  
102 Pro.

103

#### 104 **Reactive oxygen species (ROS) assay**

105 ROS were detected by using ROS Assay Kit-Highly Sensitive DCFH-DA kit (DOJINDO  
106 LABORATORIES). Calu3 cells were washed twice with HBSS buffer. Add DCFH-DA Dye  
107 probe to the cells and mixed completely, cells were incubated at 37°C for 30 min. Then  
108 wash cells for twice with HBSS buffer and observe ROS by fluorescence microscope.

109

#### 110 **Western blotting**

111 Cells were lysed for 30 min at 4°C in lysis buffer (Beyotime). After centrifugation for 10  
112 min at 12,000 × g, supernatant was boiled in loading buffer and analyzed by SDS-PAGE.  
113 Specific primary antibodies were used, followed by horseradish peroxidase-conjugated  
114 goat anti-mouse IgG or goat anti-rabbit IgG (Jackson Immunoresearch) as the  
115 secondary antibodies.

116

#### 117 **Immunoprecipitation-Mass Spectrometry**

118 A549 cells treated with or without 40 μM GTS-21 for 48 h, cells were collected and  
119 lysed in IP lysis buffer (Beyotime) for 30 min on ice. After centrifugation for 10 min at  
120 12,000 × g, the supernatants were incubated with 5 μg anti- α7 nAChR (sc-58607, Stan  
121 Cruz) antibody at 4°C overnight. 25 μl Protein G-labeled Dynabeads (Thermo Scientific)

122 were added into each sample at 4°C for 6 h. Dynabeads were washed 3 times with RIPA  
123 buffer. Proteins were eluted by boiling 10 min with loading buffer. The  
124 immunoprecipitates were separated by SDS-PAGE, each pull-down sample was run  
125 into the separation gel. We cut off the whole band as one sample and subjected it to  
126 in-gel trypsin digestion and Mass Spectrometry analysis (Performed by Orbitrap Velos  
127 Pro, Shanghai Institute of Nutrition and Health, Chinese Academy of Sciences).

128

### 129 **Statistical analysis**

130 Statistics were calculated using GraphPad Prism software (GraphPad, San Diego, CA).  
131 An unpaired t-test was used unless there were multiple comparisons, in which case we  
132 used one-way ANOVA with a post hoc Bonferroni test (with a significance level of  $p <$   
133  $0.05$ ). The results are shown as mean  $\pm$  SD.

134

135

136

137

138

139

140

141

142

143

144

145

146

147

148

149

150

151

152

Supplementary figures and legends

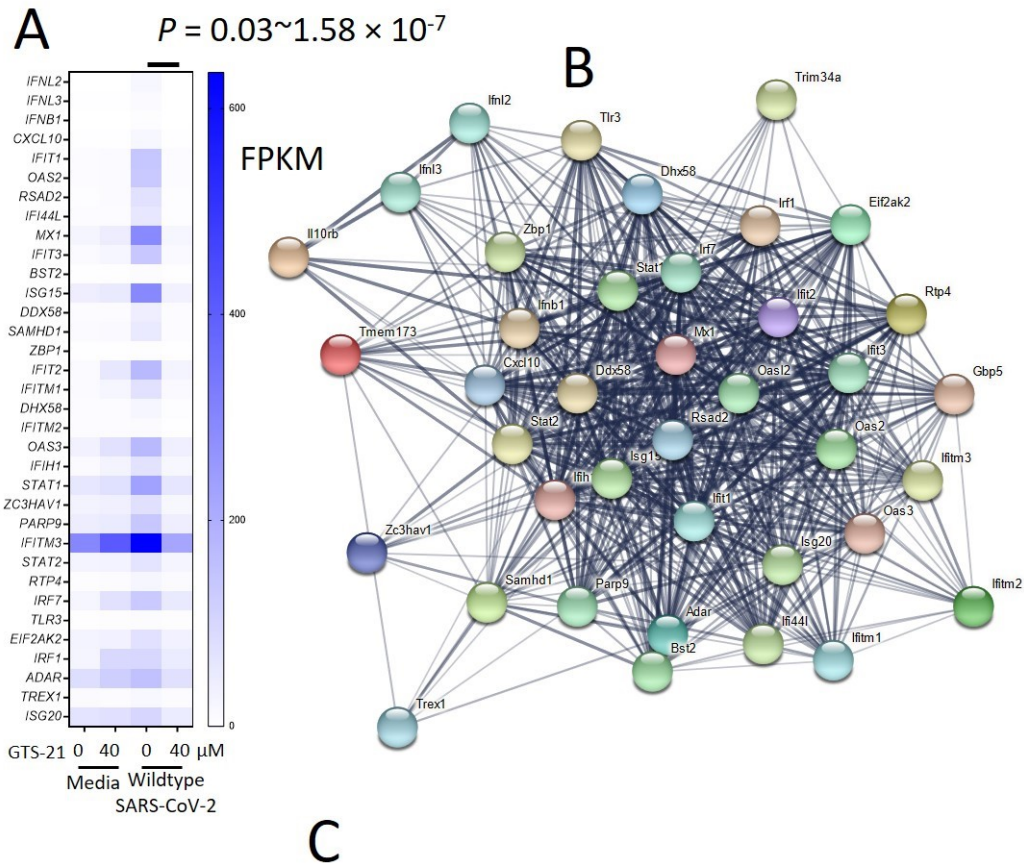

153

154

155

156

157

158

159

160

161

**Supplementary Figure S1. Analysis of downregulated viral defense response genes in RNAseq data from GTS-21 treated SARS-CoV-2 infected Calu3 cells.** **A** Hotmap of enriched genes related to viral defense responses in PBS or GTS-21 treated Calu3 cells infected with or without wild SARS-CoV-2. N = 3 in each group, P values are indicated between PBS + SARS-CoV-2 and GTS-21 + SARS-CoV-2 groups. Unpaired t test. **B-C** Protein interaction network and KEGG analysis of enriched genes related to viral defense responses in PBS or GTS-21 treated Calu3 cells infected with or without wild SARS-CoV-2.

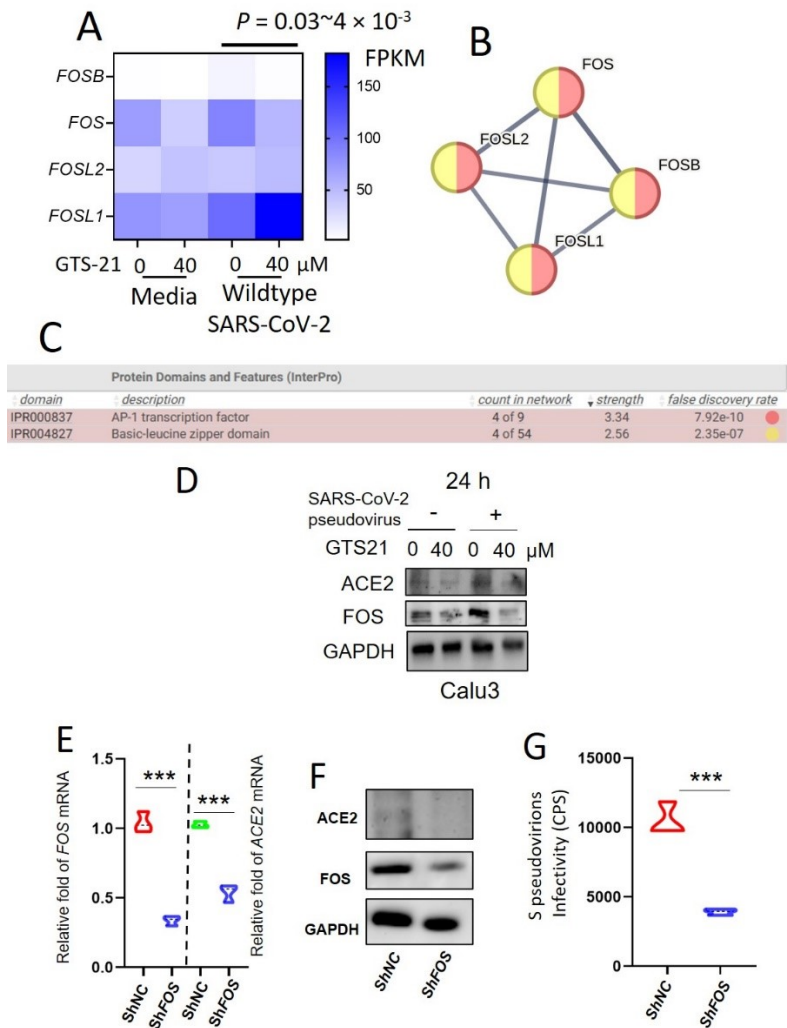

162

163 **Supplementary Figure S2. Activation of  $\alpha 7$  nAChR suppresses ACE2 expression**

164 **depending on FOS.** **A** Hotmap of enriched genes of *FOS* family in PBS or GTS-21

165 treated Calu3 cells infected with or without wild SARS-CoV-2 N = 3 in each group, P

166 values are indicated between PBS + SARS-CoV-2 and GTS-21 + SARS-CoV-2 groups.

167 Unpaired t test. **B-C** Protein interaction network and GO analysis of enriched *FOS*

168 family genes in PBS or GTS-21 treated Calu3 cells infected with or without wild SARS-

169 CoV-2. **D** Calu3 cells were pretreated with GTS-21 for 24 h and infected with

170 pseudovirus for another 24 h, the expression levels of FOS and ACE2 were detected by

171 western blotting. **E-F** In Caco2 cells, the endogenous *FOS* was knocked down with

172 lentiviruses containing specific shRNA. The mRNA and protein expression levels of FOS

173 and ACE2 were detected by RT-qPCR and western blotting. N = 3 in each group, \*\*\*P <

174 0.01 unpaired-t test. **G** the negative control and *FOS* knockdown cells were infected

175 with S pseudovirus, the infectivity was analyzed by luciferase assay. N = 3 in each group,  
176 \*\*P < 0.01 unpaired-t test.

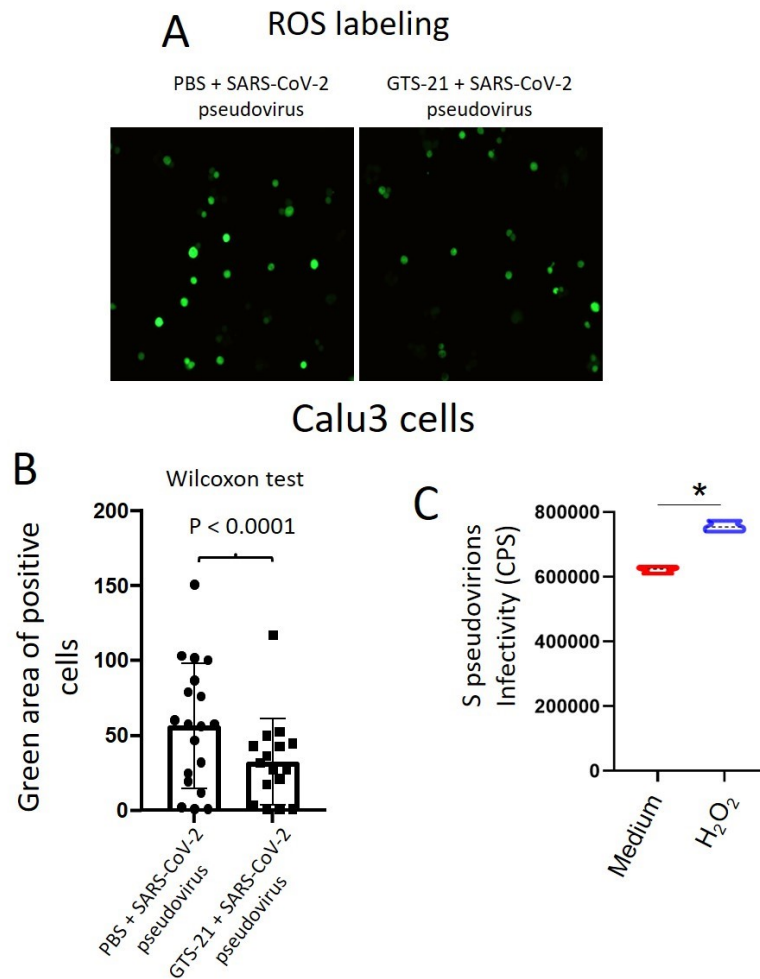

177

178 **Supplementary Figure S3. Activation of  $\alpha 7$  nAChR suppresses ROS and SARS-CoV-2**

179 **S protein entry. A-B** Calu3 cells were infected with pseudovirus and treated with GTS-

180 21 for 6 h, intracellular ROS was labeled by DCFH-DA fluorescent probes, ROS level was

181 observed by fluorescence microscope. Green positive areas were analyzed by Image-

182 pro Plus software. Experiments were repeated 3 times. P values are indicated between

183 compared groups. Wilcoxon test. **C** Caco2 cells were pretreated with  $H_2O_2$  for 4 h and

184 then infected with pseudovirus for 24 h, virus infection level was analyzed by luciferase

185 assay. N = 3 in each group, \*P < 0.05, unpaired-t test.



178 proteins interacted with  $\alpha 7$  nAChR were detected by Co-IP and Mass Spectrometry. Among them, 145 protein coding genes were found in our RNAseq database

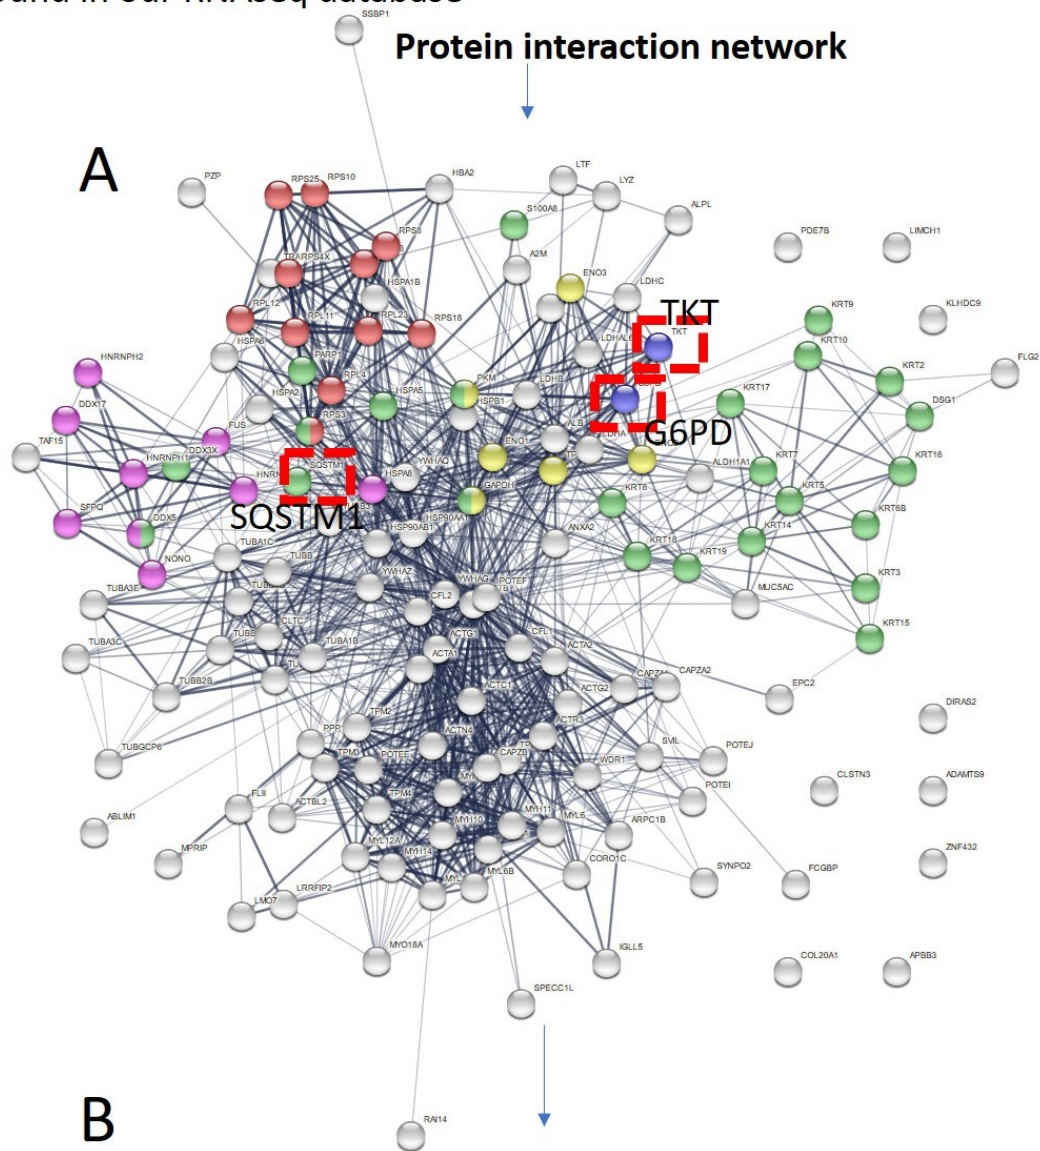

| Biological Process (Gene Ontology) |                                |                  |          |                      |
|------------------------------------|--------------------------------|------------------|----------|----------------------|
| GO-term                            | description                    | count in network | strength | false discovery rate |
| GO:0019083                         | Viral transcription            | 11 of 115        | 1.11     | 9.52e-07             |
| GO:0061621                         | Canonical glycolysis           | 6 of 27          | 1.48     | 2.78e-05             |
| GO:0012501                         | Programmed cell death          | 24 of 1054       | 0.49     | 0.00013              |
| GO:0000398                         | mRNA splicing, via spliceosome | 9 of 294         | 0.62     | 0.0212               |
| GO:0019322                         | Pentose biosynthetic process   | 2 of 4           | 1.83     | 0.0352               |

186

187 **Supplementary Figure S4. Analysis of 145  $\alpha 7$  nAChR-binding proteins incorporated**

188 **with RNAseq data from GTS-21 treated SARS-CoV-2 infected Calu3 cells. A Protein**

189 **interaction network in 145  $\alpha 7$  nAChR-binding proteins. B GO analysis of genes of 145**

190  $\alpha 7$  nAChR-binding proteins. N = 3 in each group, P < 0.05 is considered as a significant  
 191 difference in compared groups when identified the differentially expressed genes.  
 192 Unpaired-t test.

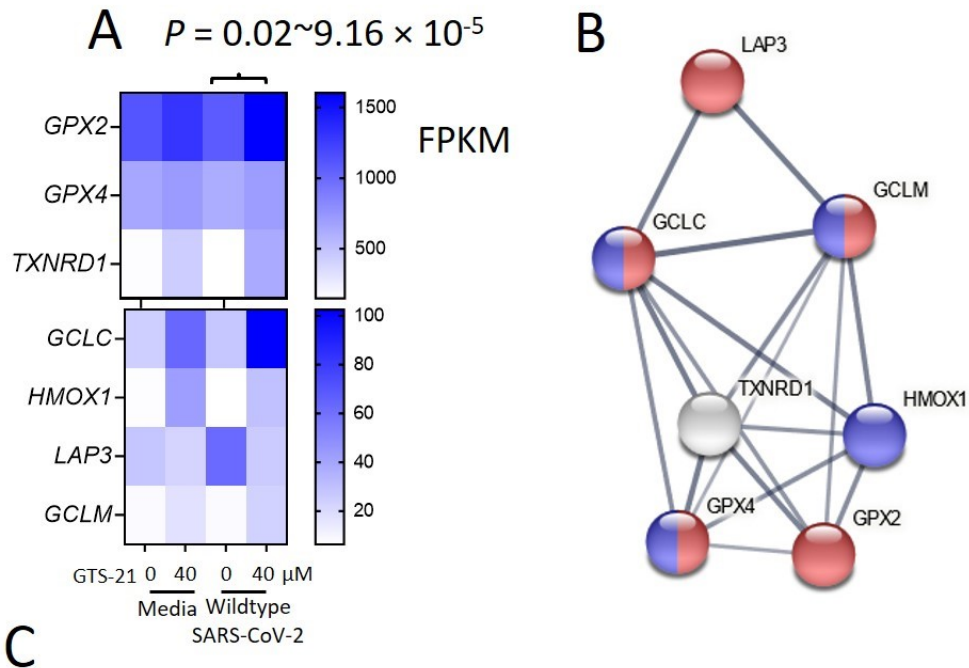

193

194 **Supplementary Figure S5. Analysis of glutathione metabolism genes in RNAseq data**  
 195 **from GTS-21 treated SARS-CoV-2 infected Calu3 cells.** **A** Hotmap of enriched genes  
 196 related to glutathione metabolism in PBS or GTS-21 treated Calu3 cells infected with  
 197 or without wild SARS-CoV-2. N = 3 in each group, P values are indicated between PBS  
 198 + SARS-CoV-2 and GTS-21 + SARS-CoV-2 groups. Unpaired t test. **B-C** Protein interaction  
 199 network and KEGG analysis of enriched genes related to glutathione metabolism in  
 200 PBS or GTS-21 treated Calu3 cells infected with or without wild SARS-CoV-2.

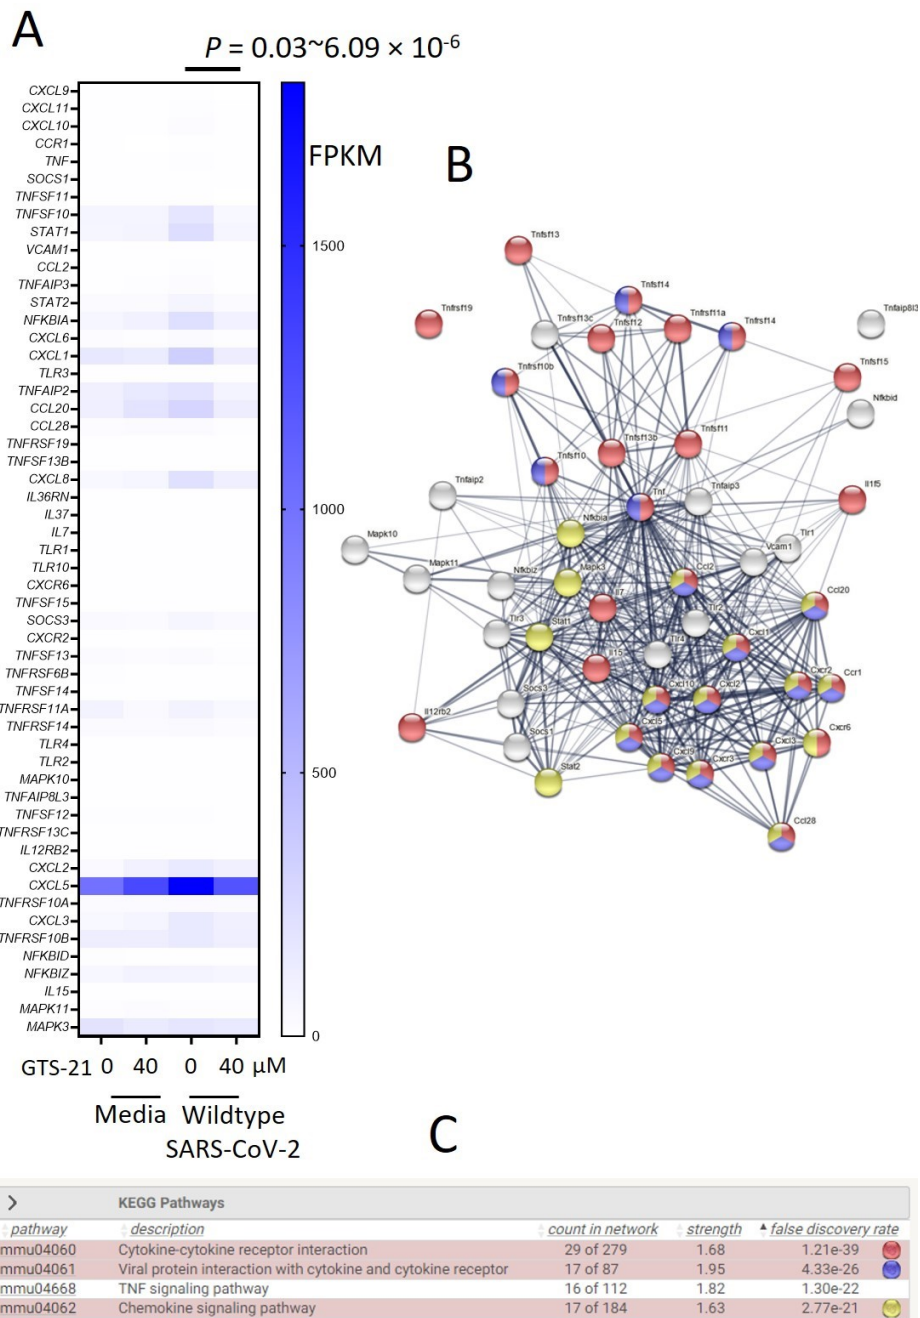

201

202

203

204

205

206

207

208

**Supplementary Figure S6. Analysis of cytokine storm genes in RNAseq data from GTS-21 treated SARS-CoV-2 infected Calu3 cells. A** Hotmap of enriched genes related to cytokine storm in PBS or GTS-21 treated Calu3 cells infected with or without wild SARS-CoV-2. N = 3 in each group, P values are indicated between PBS + SARS-CoV-2 and GTS-21 + SARS-CoV-2 groups. Unpaired t test. **B-C** Protein interaction network and KEGG analysis of enriched genes related to cytokine and chemokine in PBS or GTS-21 treated Calu3 cells infected with or without wild SARS-CoV-2.

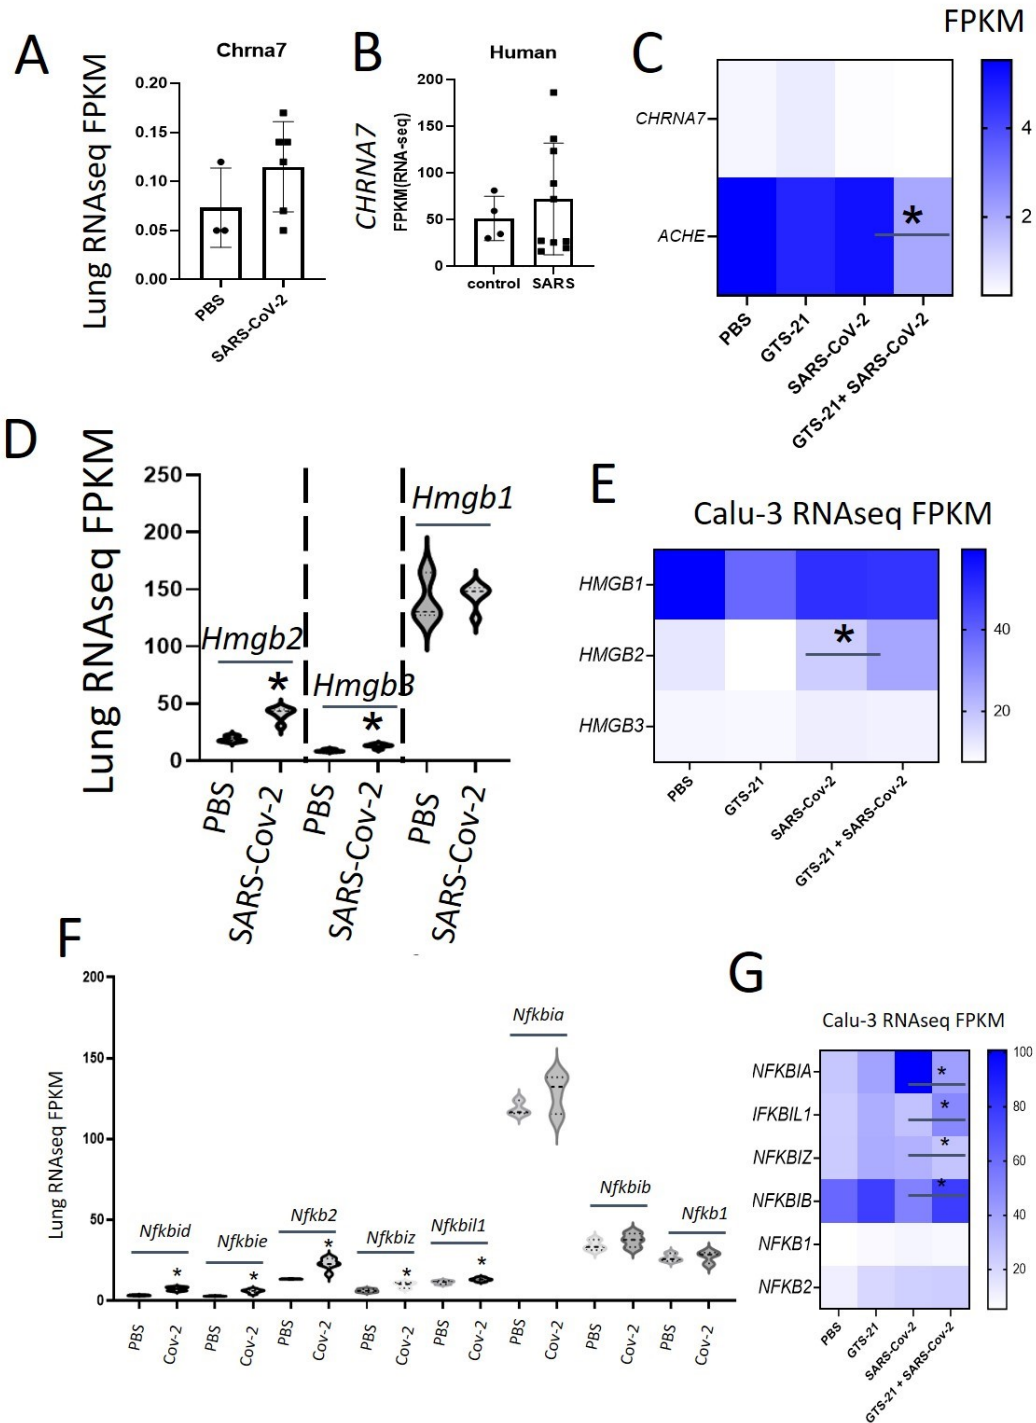

209

210 **Supplementary Figure S7. Activation of  $\alpha 7$  nAChR, which regulates SARS-CoV-2**  
 211 **infection, involves upregulation of  $\alpha 7$  nAChR, acetylcholine hydrolysis, HMGB and**  
 212 **NF- $\kappa$ B activation. A-B.**  $\alpha 7$  nAChR expression at mRNA levels in SARS-CoV-2-infected  
 213 mouse lungs and human peripheral mononuclear cells isolated from SRAS patients.

214 We analyzed GEO DataSets in Pubmed

215 (<https://www.ncbi.nlm.nih.gov/sites/GDSbrowser?acc=GDS1028>). Expression  
 216 profiling of peripheral blood mononuclear cells (PBMC) from 10 adult patients with  
 217 severe acute respiratory syndrome (SARS) was presented. **C** Hotmap of *CHRNA7* and  
 218 *ACHE* in PBS or GTS-21 treated Calu3 cells infected with or without wild SARS-CoV-2. N  
 219 = 3 in each group, \*P < 0.05 between PBS + SARS-CoV-2 and GTS-21 + SARS-CoV-2  
 220 groups. Unpaired t test. **D** Gene expression of *Hmgb*-related genes in in SARS-CoV-2-  
 221 infected mouse lungs. N=3 in PBS and N = 6 in SARS-CoV-2 infected mice. Unpaired t  
 222 test. **E** Hotmap of *HMGB1*, *HMGB2* and *HMGB3* in PBS or GTS-21 treated Calu3 cells  
 223 infected with or without wild SARS-CoV-2. N = 3 in each group, \*P < 0.05 between PBS  
 224 + SARS-CoV-2 and GTS-21 + SARS-CoV-2 groups. Unpaired t test. **F** Gene expression of  
 225 *Nfkb*-related genes in in SARS-CoV-2-infected mouse lungs. N = 3 in PBS and N = 6 in  
 226 SARS-CoV-2 infected mice. Unpaired t test. **G** Hotmap of *NFKB* related genes in PBS or  
 227 GTS-21 treated Calu3 cells infected with or without wild SARS-CoV-2. N = 3 in each  
 228 group, \*P < 0.05 between PBS + SARS-CoV-2 and GTS-21 + SARS-CoV-2 groups.  
 229 Unpaired t test.  
 230

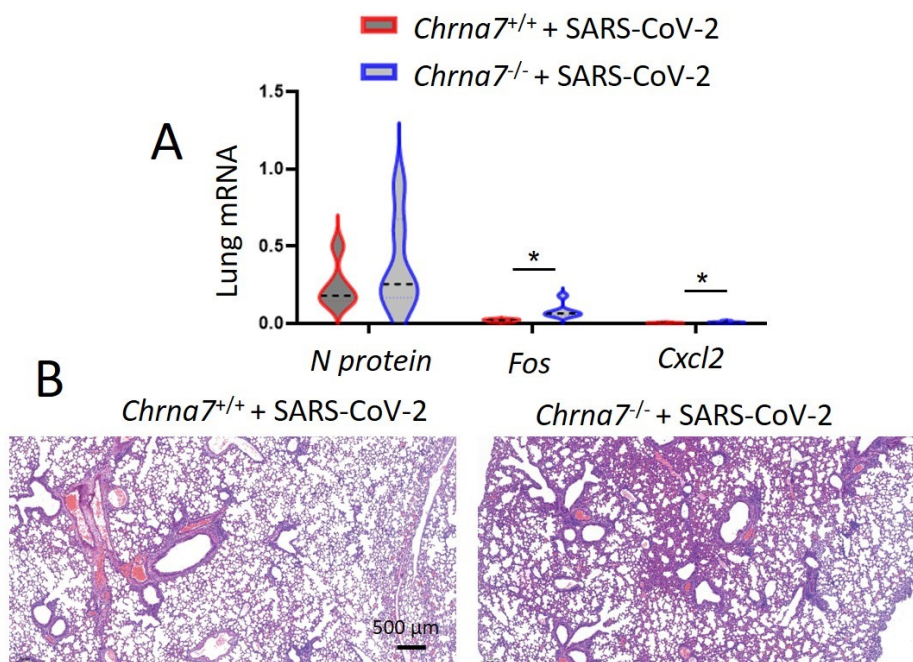

231

232 **Supplementary Figure S8. Deficiency of *Chrna7* affects lung inflammation in SARS-**  
 233 **CoV-2 infected mice.** The mice were infected with SARS-CoV-2 for 4 days and sacrificed.

234 The lungs were removed to extract RNA for qPCR or histology. **A** Changes of lung  
 235 SRARs-CoV-2 *N protein gene*, *Fos*, and *Cxcl2*. N = 5 in each group. \*P < 0.05, unpaired t  
 236 test. **B** Histology of SARS-CoV-2-infected lungs from both *Chrna7* wildtype and  
 237 knockout mice. (H&E staining, objective magnification × 10, scale bar 500 μm); N = 5  
 238 in each group.

239

240 **Repeated experiment G**

241 As stated in our last response to a reviewer request, we are unable to replicate SARS-  
 242 Cov-2 infection experiments due to the temporary unavailability of the P3 facility.  
 243 However, in the pseudo-SARS-Cov-2-infected Calu3 cells, we found that both  
 244 pretreatment and treatment with GTS-21 reduced ACE2 and FOS expression (A and B).

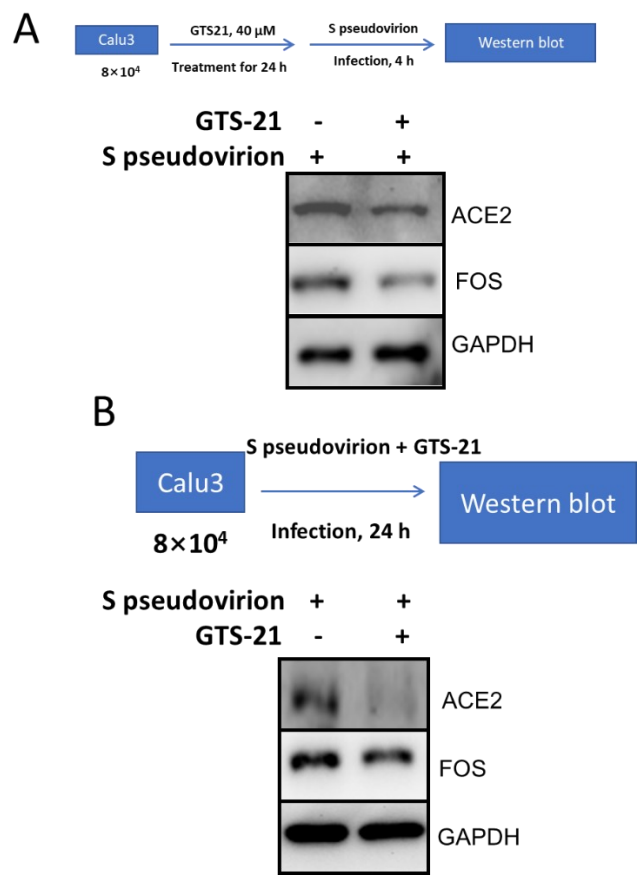

245

246 **Repeated experiment H**

247 T-5224 is a transcription factor c-Fos/AP-1 inhibitor, which specifically inhibits the DNA  
 248 binding activity of c-Fos/c-Jun without affecting other transcription factors. As below  
 249 figure demonstrated that treatment with T5224 in Caco2 cells (A) reduced ACE2

250 expression at both mRNA and protein levels (B-C).

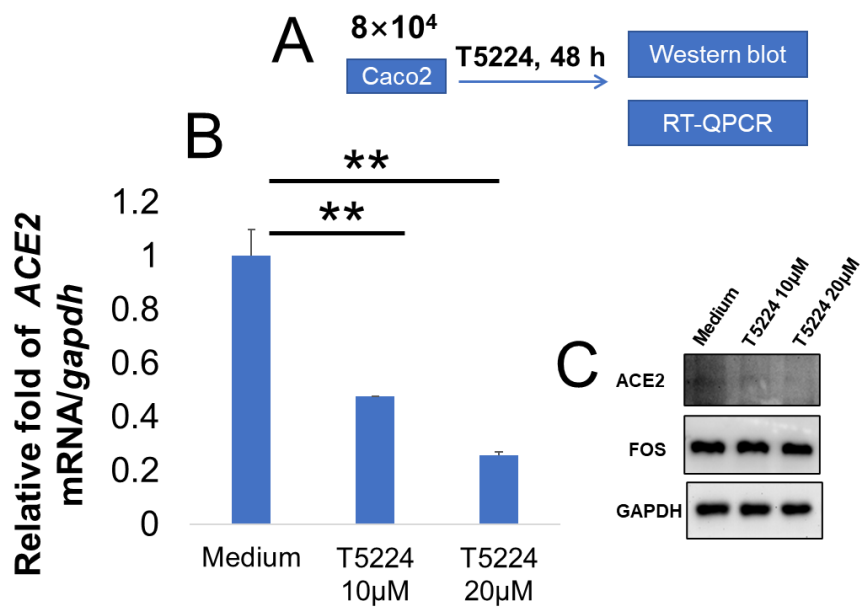

251
